# Supplementary material for: The evolution of biomass-burning aerosol size distributions due to coagulation: dependence on fire and meteorological details and parameterization
Source: Copernicus journal article supplement (doi:10.5194/acp-16-7709-2016), 2016-06-24
Supplement: Supplementary file 1 [file acp-16-7709-2016-supplement.zip]

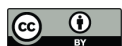

## *Supplement of*

# **The evolution of biomass-burning aerosol size distributions due to coagulation: dependence on fire and meteorological details and parameterization**

**Kimiko M. Sakamoto et al.**

*Correspondence to:* Jeffrey R. Pierce ([jeffrey.pierce@colostate.edu](mailto:jeffrey.pierce@colostate.edu))

- [acp-16-7709-2016-supplement-title-page.pdf](#)
- [P6.f90](#)

The copyright of individual parts of the supplement might differ from the CC-BY 3.0 licence.
